# Supplementary material for: Transcriptome Analysis Reveals Early Hemocyte Responses upon In Vivo Stimulation with LPS in the Stick Insect Bacillus rossius (Rossi, 1788)
Source: MDPI journal article supplement (doi:10.3390/insects13070645), 2022-07-18
Supplement: s1 [file s1]

## Supplementary information

**Supplementary Table S3a - Significantly enriched Gene Ontology terms among up-regulated DEGs**

| Biological Process |                      |                                                            |
|--------------------|----------------------|------------------------------------------------------------|
| GOID               | FDR p-value          | Term                                                       |
| GO:0030245         | 0                    | cellulose catabolic process                                |
| GO:0005975         | 1.214515580388E-49   | carbohydrate metabolic process                             |
| GO:0008152         | 1.21993571077412E-42 | metabolic process                                          |
| GO:0071555         | 1.34655311301995E-34 | cell wall organization                                     |
| GO:0007586         | 7.05237265228835E-25 | digestion                                                  |
| GO:0006508         | 2.59304219281037E-23 | proteolysis                                                |
| GO:0030574         | 3.7585767027274E-20  | collagen catabolic process                                 |
| GO:0006680         | 9.65791960050485E-19 | glucosylceramide catabolic process                         |
| GO:0006869         | 1.59584502156171E-12 | lipid transport                                            |
| GO:0007040         | 1.64073717654072E-12 | lysosome organization                                      |
| GO:0006665         | 1.96961773792594E-12 | sphingolipid metabolic process                             |
| GO:0006629         | 3.03546449835853E-12 | lipid metabolic process                                    |
| GO:0008203         | 8.699554686945E-12   | cholesterol metabolic process                              |
| GO:0030259         | 2.96004131795191E-11 | lipid glycosylation                                        |
| GO:0010466         | 3.86133130302621E-11 | negative regulation of peptidase activity                  |
| GO:0000272         | 3.08972841103233E-10 | polysaccharide catabolic process                           |
| GO:0006865         | 9.49656688486223E-10 | amino acid transport                                       |
| GO:0010951         | 3.00103925560082E-09 | negative regulation of endopeptidase activity              |
| GO:0006820         | 4.66615053290409E-09 | anion transport                                            |
| GO:0015739         | 9.75904458530747E-09 | sialic acid transport                                      |
| GO:0032006         | 9.75904458530747E-09 | regulation of TOR signaling                                |
| GO:0000023         | 4.30783666721812E-08 | maltose metabolic process                                  |
| GO:0007158         | 2.98135890193205E-07 | neuron cell-cell adhesion                                  |
| GO:0016139         | 1.69600790305773E-06 | glycoside catabolic process                                |
| GO:1902600         | 2.25535325376343E-06 | proton transmembrane transport                             |
| GO:0016042         | 3.2186291182804E-06  | lipid catabolic process                                    |
| GO:0006013         | 4.01712929751235E-06 | mannose metabolic process                                  |
| GO:0034219         | 6.09953064835086E-06 | carbohydrate transmembrane transport                       |
| GO:0008202         | 8.32330046913199E-06 | steroid metabolic process                                  |
| GO:0019433         | 1.3692624940832E-05  | triglyceride catabolic process                             |
| GO:0031333         | 1.3692624940832E-05  | negative regulation of protein-containing complex assembly |
| GO:0006811         | 1.84349564963316E-05 | ion transport                                              |
| GO:0042742         | 4.94768611975568E-05 | defense response to bacterium                              |
| GO:0050767         | 9.92534320191078E-05 | regulation of neurogenesis                                 |
| GO:0006633         | 0.000236102142452    | fatty acid biosynthetic process                            |
| GO:0007602         | 0.00060245059553     | phototransduction                                          |
| GO:0007155         | 0.001415093794288    | cell adhesion                                              |
| GO:0006914         | 0.002064395452878    | autophagy                                                  |

**Molecular Function**

| <b>GOID</b> | <b>FDR p-value</b>   | <b>Term</b>                                          |
|-------------|----------------------|------------------------------------------------------|
| GO:0004650  | 0                    | polygalacturonase activity                           |
| GO:0008810  | 0                    | cellulase activity                                   |
| GO:0030248  | 0                    | cellulose binding                                    |
| GO:0045735  | 0                    | nutrient reservoir activity                          |
| GO:0016787  | 1.6374950118022E-74  | hydrolase activity                                   |
| GO:0016798  | 1.46714572931193E-70 | hydrolase activity, acting on glycosyl bonds         |
| GO:0008236  | 1.312572679975E-44   | serine-type peptidase activity                       |
| GO:0004252  | 2.07812931328317E-38 | serine-type endopeptidase activity                   |
| GO:0004553  | 8.00860808666312E-28 | hydrolase activity, hydrolyzing O-glycosyl compounds |
| GO:0008233  | 8.70895876688556E-27 | peptidase activity                                   |
| GO:0052689  | 3.15491761195883E-25 | carboxylic ester hydrolase activity                  |
| GO:0004348  | 1.70295508095181E-17 | glucosylceramidase activity                          |
| GO:0008061  | 1.35544417589433E-16 | chitin binding                                       |
| GO:0080030  | 5.0093834081097E-14  | methyl indole-3-acetate esterase activity            |
| GO:0030414  | 1.26594203213536E-12 | peptidase inhibitor activity                         |
| GO:0030246  | 6.64925433015046E-12 | carbohydrate binding                                 |
| GO:0046527  | 1.37405108648468E-10 | glucosyltransferase activity                         |
| GO:0050295  | 1.37405108648468E-10 | steryl-beta-glucosidase activity                     |
| GO:0004806  | 1.8265432874895E-10  | triglyceride lipase activity                         |
| GO:0004867  | 3.16640751298529E-10 | serine-type endopeptidase inhibitor activity         |
| GO:0004180  | 6.43754918472335E-10 | carboxypeptidase activity                            |
| GO:0015538  | 9.32070436590324E-10 | sialic acid:proton symporter activity                |
| GO:0005351  | 2.22967770349373E-09 | carbohydrate:proton symporter activity               |
| GO:0005319  | 2.24883179884189E-09 | lipid transporter activity                           |
| GO:0004453  | 3.20488889123692E-09 | juvenile-hormone esterase activity                   |
| GO:0015136  | 9.75904458530747E-09 | sialic acid transmembrane transporter activity       |
| GO:0004565  | 1.11433274064345E-08 | beta-galactosidase activity                          |
| GO:0004185  | 4.30783666721812E-08 | serine-type carboxypeptidase activity                |
| GO:0004558  | 4.30783666721812E-08 | alpha-1,4-glucosidase activity                       |
| GO:0032450  | 4.30783666721812E-08 | maltose alpha-glucosidase activity                   |
| GO:0090599  | 1.13253996227628E-07 | alpha-glucosidase activity                           |
| GO:0004465  | 2.98135890193205E-07 | lipoprotein lipase activity                          |
| GO:0008237  | 3.94479865650776E-07 | metallopeptidase activity                            |
| GO:0004177  | 1.4135023060096E-06  | aminopeptidase activity                              |
| GO:0019137  | 1.69600790305773E-06 | thioglucosidase activity                             |
| GO:0102799  | 1.69600790305773E-06 | glucosinolate glucohydrolase activity                |
| GO:0016298  | 1.85729486999473E-06 | lipase activity                                      |
| GO:0008239  | 4.01712929751235E-06 | dipeptidyl-peptidase activity                        |
| GO:0008201  | 1.20014737464732E-05 | heparin binding                                      |
| GO:0005506  | 1.93874766847837E-05 | iron ion binding                                     |
| GO:0004620  | 2.21601897201465E-05 | phospholipase activity                               |
| GO:0015293  | 2.68568643945578E-05 | symporter activity                                   |
| GO:0016491  | 9.76133762501589E-05 | oxidoreductase activity                              |
| GO:0004181  | 0.000159412571869    | metallocarboxypeptidase activity                     |
| GO:0004497  | 0.000337676502661    | monooxygenase activity                               |
| GO:0008081  | 0.001339457644943    | phosphoric diester hydrolase activity                |
| GO:0016757  | 0.001743538174741    | glycosyltransferase activity                         |
| GO:0008289  | 0.002268787371337    | lipid binding                                        |

**Cellular Component**

| <b>GOID</b> | <b>FDR p-value</b>   | <b>Term</b>                              |
|-------------|----------------------|------------------------------------------|
| GO:0005576  | 2.5098951236231E-109 | extracellular region                     |
| GO:0005615  | 5.3958134550437E-32  | extracellular space                      |
| GO:0005764  | 1.61564017209859E-27 | lysosome                                 |
| GO:0005765  | 6.6044097051477E-09  | lysosomal membrane                       |
| GO:0009507  | 2.83986975603875E-07 | chloroplast                              |
| GO:0009536  | 4.01712929751235E-06 | plastid                                  |
| GO:0062023  | 4.5775490831419E-06  | collagen-containing extracellular matrix |
| GO:0005773  | 1.20014737464732E-05 | vacuole                                  |
| GO:0031225  | 3.45819480049203E-05 | anchored component of membrane           |
| GO:0005774  | 0.000471337134743    | vacuolar membrane                        |

**Supplementary table S3b - Significantly enriched Gene Ontology terms among down-regulated DEGs**

| <b>Biological Process</b> |                      |                         |
|---------------------------|----------------------|-------------------------|
| <b>GOID</b>               | <b>FDR p-value</b>   | <b>Term</b>             |
| GO:0005576                | 1.30195504158305E-06 | transmembrane transport |
| GO:0005886                | 8.83308292271826E-05 | trehalose transport     |
| GO:0045202                | 0.000446123597091    | ion transport           |

### Molecular Function

| <b>GOID</b> | <b>FDR p-value</b>   | <b>Term</b>                                  |
|-------------|----------------------|----------------------------------------------|
| GO:0008061  | 2.35199582218479E-08 | chitin binding                               |
| GO:0015574  | 8.83308292271826E-05 | trehalose transmembrane transporter activity |
| GO:0051119  | 0.000128056436917    | sugar transmembrane transporter activity     |
| GO:0022857  | 0.000235074203931    | transmembrane transporter activity           |

**Cellular Component**

| <b>GOID</b> | <b>FDR p-value</b>   | <b>Term</b>          |
|-------------|----------------------|----------------------|
| GO:0005576  | 2.32786370003497E-08 | extracellular region |
| GO:0005886  | 3.05222802041221E-08 | plasma membrane      |
| GO:0045202  | 0.000596750331085    | synapse              |
