# Supplementary material for: Transcriptome Analysis Reveals Early Hemocyte Responses upon In Vivo Stimulation with LPS in the Stick Insect Bacillus rossius (Rossi, 1788)
Source: MDPI journal article supplement (doi:10.3390/insects13070645), 2022-07-18
Supplement: s1 [file s1]

## Supplementary information

**Supplementary Table S1 - Details on the number of raw and trimmed reads from samples sequenced in this work and from two BioProjects # PRJNA578804 and PRJNA286345. The SRA experiment accession # is indicated next to sample names.**

| <b>Sample</b>               | <b>Raw reads</b> | <b>Trimmed reads</b> |
|-----------------------------|------------------|----------------------|
| pre LPS_challenge (control) | 239,468,810      | 237,703,224          |
| post LPS-challenge          | 241,299,648      | 239,551,214          |
| generic sample (SRR2230515) | 14,863,824       | 14,853,454           |
| gonads (SRR10323864)        | 43,650,866       | 43,568,100           |
| legs (SRR10323863)          | 40,967,802       | 40,886,970           |
| gonad (SRR10323862)         | 46,094,346       | 46,029,074           |
| legs (SRR10323861)          | 34,612,676       | 34,553,254           |
| gonad (SRR10323860)         | 44,731,242       | 44,641,708           |
| legs (SRR10323859)          | 35,538,036       | 35,445,820           |
| gonad (SRR10323858)         | 58,663,496       | 58,519,446           |
| legs (SRR10323857)          | 42,283,932       | 42,171,556           |
| gonad (SRR10323855)         | 48,824,438       | 48,733,278           |
| legs (SRR10323854)          | 44,886,718       | 44,782,516           |
| gonad (SRR10323853)         | 53,899,904       | 53,798,006           |
| legs (SRR10323852)          | 46,716,924       | 46,568,008           |
| Total                       | 1,036,502,662    | 1,031,805,628        |
